# Supplementary material for: A sustainable hierarchical carbon derived from cultivated fibroid fungus for high performance lithium–sulfur batteries
Source: Royal Society of Chemistry journal article supplement (doi:10.1039/c7ra08501j), 2017-01-01
Supplement: c7ra08501j1.pdf [file c7ra08501j1.pdf]

## Supporting information

### A sustainably hierarchical carbon derived from cultivated fibroid fungus for high performance lithium-sulfur batteries

*Huali Wu<sup>1</sup>, Jiafu Lin<sup>2</sup>, Jirong Mou<sup>1</sup>, Qiaoji Zheng<sup>1</sup>, Dunmin Lin<sup>1,\*</sup>*

<sup>1</sup>College of Chemistry and Materials Science, Sichuan Normal University, Chengdu  
610066, China

<sup>2</sup>Antibiotics Research and Re-evaluation Key Laboratory of Sichuan Province,  
Sichuan Industrial Institute of Antibiotics, Chengdu University, Chengdu, 400001,  
China.

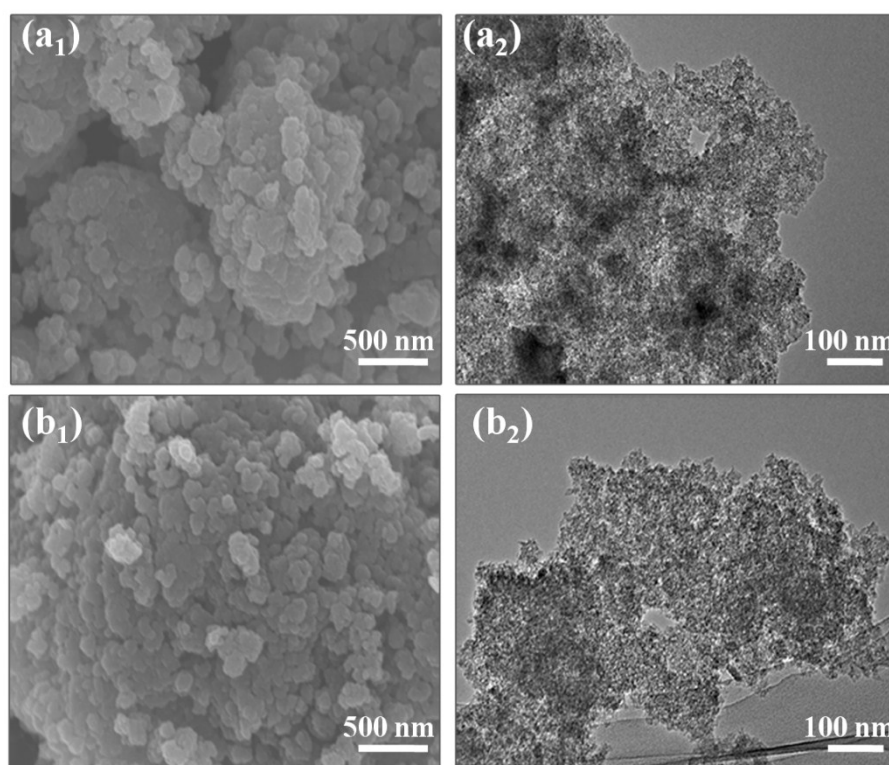

**Fig.S1** SEM and TEM images of nAFC/S (a<sub>1</sub>, a<sub>2</sub>) and HAFC/S (b<sub>1</sub>, b<sub>2</sub>) composites

---

\* Corresponding author: Tel.: +86 28 84760802; Fax: +86 28 84760802; E-mail: [ddmd222@sicnu.edu.cn](mailto:ddmd222@sicnu.edu.cn) (Dunmin Lin)

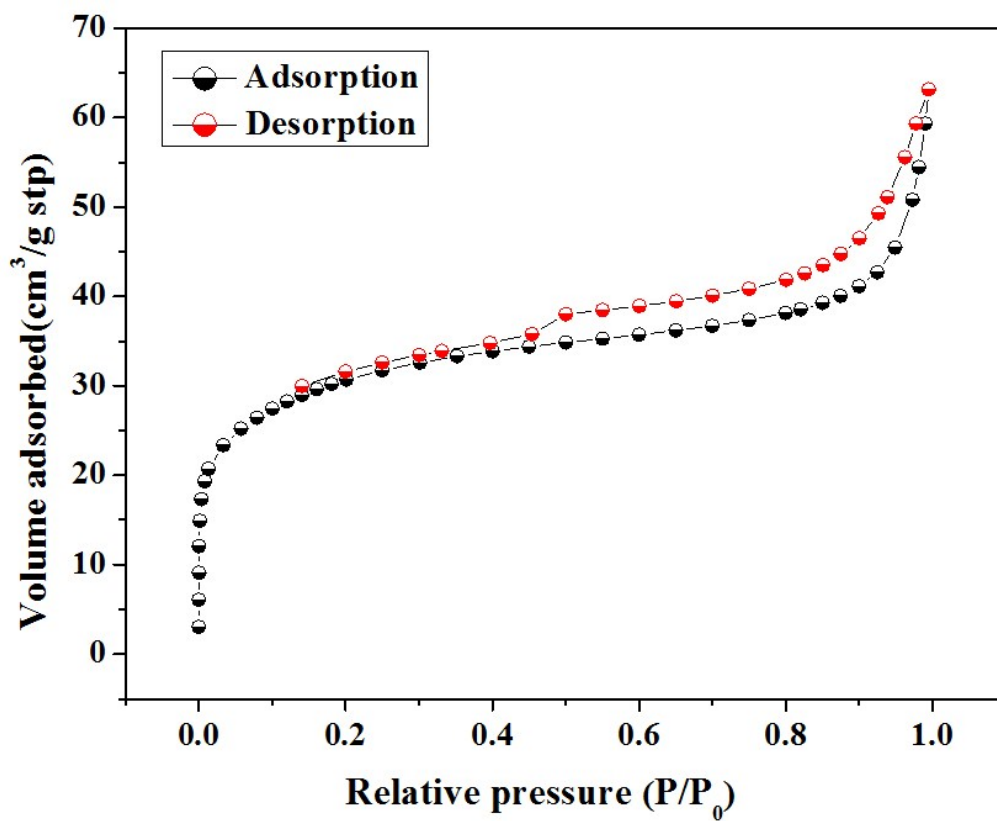

Fig.S2 Nitrogen adsorption-desorption isotherms of HAFC/S composite

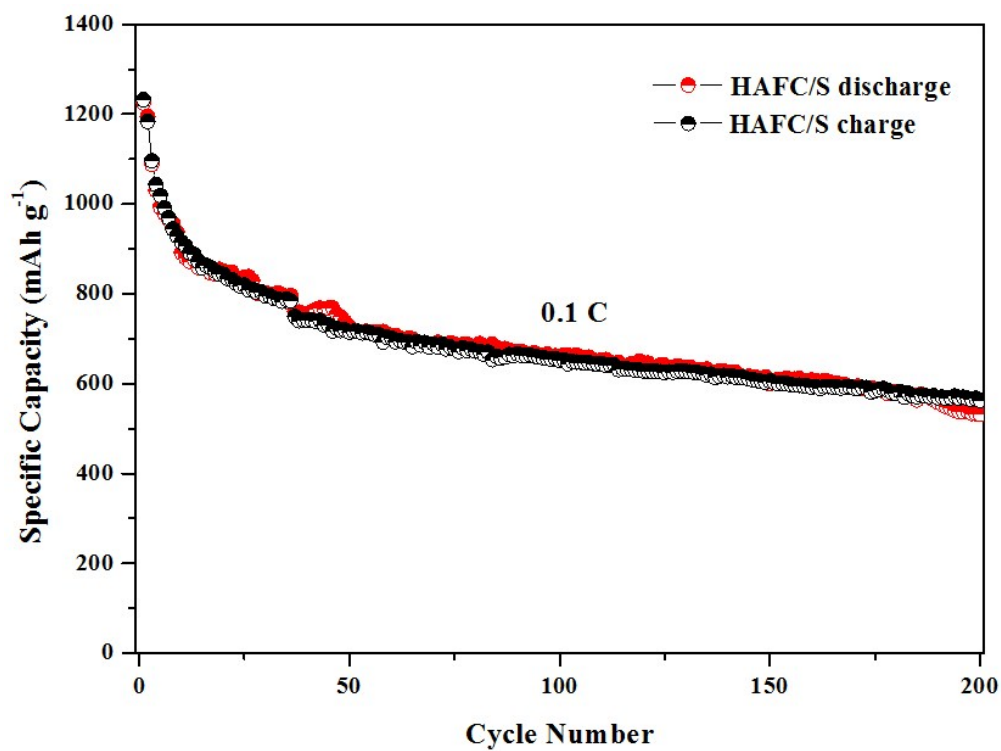

Fig. S3 The long cycling performance of HAFC/S electrode at 0.1C
